# Supplementary material
Source: publisher site journal article supplement (https://content.cld.iop.org/journals/1748-9326/16/3/034048/revision3/erlabce83supp1.pdf)
Supplement: Supplementary file 1 [file erlabce83supp1.pdf]

# Biophysical and socioeconomic drivers of oil palm expansion in Indonesia

Yu Xin, Laixiang Sun, Matthew C. Hansen

## Supplementary Information

### S1. Spatial panel models

Our objective is to estimate the following model efficiently and consistently:

$$d_{it} = \exp(\alpha + \beta X_{it} + \varepsilon_{it}), \quad (1)$$

where  $d_{it}$  is the area of oil palm expansion into each source land at regency  $i$  over year  $t - 1$  and  $t$ .  $X$  is a panel of explanatory variables (time-variant and time-invariant; same as those listed in the pooled model) and  $\varepsilon_{it}$  is an error term.

$$\log(d_{it}) = \alpha + \beta X_{it} + \varepsilon_{it} \quad (2)$$

For oil palm expansion models, the standard pooled estimation may be insufficient due to the individual heterogeneity and the spatial autocorrelation of land-use change among regencies. Therefore, spatial panel models, including spatially lagged dependent variable, spatial error autocorrelation, and spatial Durbin models, were implemented. We ran random effect rather than fixed effect regressions, because we are also interested in the time-invariant variables.

#### Random effect spatial lag models

$$\log(d_{it}) = \lambda \sum_{j=1}^N w_{ij} \log(d_{jt}) + X_{it}\beta + \varepsilon_{it} \quad (3)$$

$$\varepsilon_{it} = a_i + u_{it} \quad (4)$$

$$E(u_t)=0; E(u_t u_t) = \sigma^2 I_N \quad (5)$$

#### Random effect spatial error models

$$\log(d_{it}) = X_{it}\beta + \varphi_{it} \quad (6)$$

$$\varphi_{it} = \rho \sum_{j=1}^N w_{ij} \varphi_{jt} + \alpha_i + u_{it} \quad (7)$$

$$\varepsilon_{it} = a_i + u_{it} \quad (8)$$

$$E(u_t)=0; E(u_t u_t) = \sigma^2 I_N \quad (9)$$

#### Random effect spatial Durbin models

$$\log (d_{it}) = \lambda \sum_{j=1}^N w_{ij} \log (d_{jt}) + \alpha_i + X_{it}\boldsymbol{\beta}_1 + \rho \sum_{j=1}^N w_{ij} X_{it}\boldsymbol{\beta}_2 + \varepsilon_{it} \quad (10)$$

$$\varepsilon_{it} = a_i + u_{it} \quad (11)$$

$$E(u_t)=0; E(u_t u_t) = \sigma^2 I_N \quad (12)$$

In Eqs. (3), (6), (15),

- $d_{it}$  represents the aggregate indicator of water quality in year  $t$ .
- $X_{it}$  includes 1) the time-variant variable: climatic factors in year  $t$ , such as annual precipitation, precipitation in the driest month, average annual temperature, shortwave radiation; the percentage of regency within a protected area in year  $t$ ; population density in year  $t$ ; source land ratio (second-order polynomial) in year  $t$ , and export value averaged over the previous period; and 2) Time-invariant variables: biophysical and geographical factors, such as potential yield of oil palm plantation, slope, elevation, AWC, peatland percentage; and factors characterizing accessibility to market and infrastructure, such as average access time large cities, density of palm oil mills, and percentage of estate crop plantation in 1990.
- $w_{ij}$  is the spatial weight.

Table S1. Land use and Land cover classification

| Class                     | Description                                                                                                                                                   | Re-Class             |
|---------------------------|---------------------------------------------------------------------------------------------------------------------------------------------------------------|----------------------|
| Primary Dryland Forest    | Natural forest, dry habitat                                                                                                                                   | Primary Forest       |
| Secondary Dryland Forest  | Logging signs, dry habitat                                                                                                                                    | Secondary Forest     |
| Primary Mangrove Forest   | No or low human activity, wetland forest in coastal areas                                                                                                     | Primary Forest       |
| Secondary Mangrove Forest | Logging signs, wetland forest in coastal areas                                                                                                                | Secondary Forest     |
| Primary Swamp Forest      | Natural forest, wet habitat                                                                                                                                   | Primary Forest       |
| Secondary Swamp Forest    | Logging signs, wet habitat                                                                                                                                    | Secondary Forest     |
| Plantation Forest         | Dominated by homogeneous tree species for specific purposes, structural composition. Reforestation, industrial plantation forest, community plantation forest | Others               |
| Dry Shrub                 | Highly degraded logged-over area, non-wet habitat, ongoing process of succession                                                                              | Shrub                |
| Wet Shrub                 | Highly degraded logged-over area, wet habitat, ongoing process of succession                                                                                  | Shrub                |
| Savanna and Grasses       | Grasses and scattered natural trees and shrubs                                                                                                                | Others               |
| Pure Dry Agriculture      | Agricultural activities on dry/ non-wet land, e.g. moor, mixed garden, agriculture fields                                                                     | Dry Agriculture      |
| Mixed Dry Agriculture     | Agricultural activities on dry/ non-wet land mixed with shrubs, thickets, and logged-over forest                                                              | Dry Agriculture      |
| Paddy Field               | Agriculture areas on wet habitat, especially for paddy                                                                                                        | Others               |
| Estate Crop               | Planted estate areas, mostly with perennials crops or other agricultural trees commodities                                                                    | Estate Crop          |
| Settlement Areas          | Rural, urban, industrial and other built-up areas                                                                                                             | Others               |
| Transmigration Areas      | Unique settlement areas associated with houses and agroforestry and/or garden                                                                                 | Others               |
| Port and Harbor           | Big enough to be delineated as independent object                                                                                                             | Others               |
| Bare Ground               | No vegetation cover                                                                                                                                           | Bare Ground          |
| Mining Areas              | Open mining activities                                                                                                                                        | Others               |
| Open Swamp                | Wetland with few vegetation                                                                                                                                   | Others               |
| Fish Pond/Aquaculture     | Aquaculture activities                                                                                                                                        | Others               |
| Open Water                | Ocean, rivers, lakes, and ponds                                                                                                                               | Others               |
| Cloud and No-Data         | Clouds, cloud shadows or data gaps with a size of more than 4 cm <sup>2</sup> at 100,000 scale display                                                        | No Data<br>(Removed) |

Table S2. Variable, data description and data sources

| Variable                             | Data Description                                                                                                                                                                                                                                | Data Source                                                                                                                                                                                                                                                                                                            |
|--------------------------------------|-------------------------------------------------------------------------------------------------------------------------------------------------------------------------------------------------------------------------------------------------|------------------------------------------------------------------------------------------------------------------------------------------------------------------------------------------------------------------------------------------------------------------------------------------------------------------------|
| Land cover and land use              | Land use and land cover maps of Indonesia, 1990-2015                                                                                                                                                                                            | Indonesian Ministry of the Environment Life and Forestry. 2020. Indonesian Land Cover Closure. Available at: <a href="http://webgis.menlhk.go.id:8080/pl/pl.htm">http://webgis.menlhk.go.id:8080/pl/pl.htm</a> .                                                                                                       |
| Potential yield of oil palm          | IIASA/FAO. Global Agro-ecological Zones (GAEZ v3.0, v4)                                                                                                                                                                                         | <a href="http://webarchive.iiasa.ac.at/Research/LUC/GAEZv3.0/">http://webarchive.iiasa.ac.at/Research/LUC/GAEZv3.0/</a><br><a href="https://iiasa.ac.at/web/home/research/researchPrograms/water/GAEZ_v.4_Data_Portal.html">https://iiasa.ac.at/web/home/research/researchPrograms/water/GAEZ_v.4_Data_Portal.html</a> |
| Precipitation (Rainfall)             | Weedon, G.P., G. Balsamo, N. Bellouin, S. Gomes, MJ Best, and P. Viterbo, 2014: The WFDEI meteorological forcing data set. WATCH Forcing Data methodology applied to ERA-Interim reanalysis data. <i>Water Resource Research</i> , 50: 7505-14. | <a href="https://doi.org/10.5065/486N-8109">https://doi.org/10.5065/486N-8109</a> .                                                                                                                                                                                                                                    |
| Precipitation of driest month        |                                                                                                                                                                                                                                                 |                                                                                                                                                                                                                                                                                                                        |
| Temperature                          |                                                                                                                                                                                                                                                 |                                                                                                                                                                                                                                                                                                                        |
| Radiation (shortwave)                |                                                                                                                                                                                                                                                 |                                                                                                                                                                                                                                                                                                                        |
| Export quantity and value            | Export quantity and value of palm oil and products, UN-FAO                                                                                                                                                                                      | <a href="http://www.fao.org/faostat/en/#data/TP">http://www.fao.org/faostat/en/#data/TP</a> .                                                                                                                                                                                                                          |
| Palm oil mill density                | Universal Mill List (UML) (WRI/ Rainforest Alliance /Proforest/Daemeter, 2018)                                                                                                                                                                  | <a href="http://www.globalforestwatch.org">www.globalforestwatch.org</a>                                                                                                                                                                                                                                               |
| Access time                          | Travel time to major cities: A global map of Accessibility (Nelson, A., 2008)                                                                                                                                                                   | <a href="https://forobs.jrc.ec.europa.eu/products/gam/index.php">https://forobs.jrc.ec.europa.eu/products/gam/index.php</a>                                                                                                                                                                                            |
| Elevation                            | Shuttle Radar Topography Mission (NASA, 2009)                                                                                                                                                                                                   | <a href="https://earthexplorer.usgs.gov/">https://earthexplorer.usgs.gov/</a>                                                                                                                                                                                                                                          |
| Slope                                |                                                                                                                                                                                                                                                 |                                                                                                                                                                                                                                                                                                                        |
| Available Water Capacity (AWC)       | Harmonized world soil database (HWSD) (FAO/IIASA/ISRIC/ISSCAS/JRC, 2012)                                                                                                                                                                        | <a href="http://www.fao.org/soils-portal/soil-survey/soil-maps-and-databases/harmonized-world-soil-database-v12/en/">http://www.fao.org/soils-portal/soil-survey/soil-maps-and-databases/harmonized-world-soil-database-v12/en/</a>                                                                                    |
| Peatland percentage                  | Peat lands (World Resources Institute, 2012. Accessed through Global Forest Watch)                                                                                                                                                              | <a href="http://www.globalforestwatch.org">www.globalforestwatch.org</a>                                                                                                                                                                                                                                               |
| Population density                   | Gridded Population of the World (GPW) (CIESIN)                                                                                                                                                                                                  | <a href="http://sedac.ciesin.columbia.edu/gpw/index.jsp">http://sedac.ciesin.columbia.edu/gpw/index.jsp</a><br><a href="http://dx.doi.org/10.7927/H4NP22DQ">http://dx.doi.org/10.7927/H4NP22DQ</a>                                                                                                                     |
| Protected area                       | World Database on Protected Areas (WDPA). IUCN and UNEP. Cambridge (UK). c2014.                                                                                                                                                                 | <a href="http://www.protectedplanet.net">www.protectedplanet.net</a>                                                                                                                                                                                                                                                   |
| Sub-national administrative boundary | GeoNetwork – Sub-national Administrative Units of Indonesia. (FAO, 2002)                                                                                                                                                                        | <a href="http://www.fao.org/geonetwork/srv/en/main.home?uuiid=c8ee1300-88fd-11da-a88f-000d939bc5d8">http://www.fao.org/geonetwork/srv/en/main.home?uuiid=c8ee1300-88fd-11da-a88f-000d939bc5d8</a>                                                                                                                      |

Table S3. Measurement units and summary statistics of variables

| Variable                       | Unit                       | Indonesia |         |        | Sumatra |         |        | Kalimantan |         |        |
|--------------------------------|----------------------------|-----------|---------|--------|---------|---------|--------|------------|---------|--------|
|                                |                            | mean      | min     | max    | mean    | min     | max    | mean       | min     | max    |
| Expansion into forest          | %                          | 1.17      | 0       | 185.94 | 3.33    | 0       | 146.90 | 2.78       | 0       | 185.94 |
| Expansion into shrub           | %                          | 1.12      | 0       | 257.86 | 2.81    | 0       | 257.86 | 3.40       | 0       | 57.50  |
| Expansion into dry agriculture | %                          | 0.77      | 0       | 152.63 | 1.91    | 0       | 152.63 | 2.16       | 0       | 129.13 |
| Potential yield of oil palm    | ton/ha                     | 49.03     | 0       | 75.91  | 57.48   | 5.62    | 72.15  | 65.74      | 43.26   | 71.16  |
| Plantation in 1990             | %                          | 3.20      | 0       | 71.76  | 9.35    | 0       | 71.76  | 1.77       | 0       | 16.23  |
| Precipitation                  | mm/day                     | 6.96      | 2.80    | 13.41  | 7.67    | 4.21    | 12.42  | 7.87       | 5.30    | 12.75  |
| Precipitation of driest month  | mm/day                     | 0.72      | 0       | 6.68   | 1.32    | 0       | 5.58   | 1.09       | 0       | 5.38   |
| Temperature                    | K                          | 299.53    | 296.51  | 301.45 | 299.76  | 296.76  | 301.29 | 299.81     | 298.12  | 301.14 |
| Radiation                      | W/m <sup>2</sup>           | 206.06    | 154.02  | 248.85 | 187.06  | 165.31  | 205.94 | 189.39     | 167.93  | 212.72 |
| Export value                   | Billion 2000 USD           | 4.55      | 0.66    | 13.66  | 4.55    | 0.66    | 13.66  | 4.55       | 0.66    | 13.66  |
| Palm oil mill density          | /100 km <sup>2</sup>       | 0.041     | 0       | 3.35   | 0.16    | 0       | 3.35   | 0.028      | 0       | 0.39   |
| Access time                    | day                        | 0.28      | 1.48E-3 | 2.50   | 0.28    | 6.62E-3 | 0.97   | 0.67       | 0.035   | 2.067  |
| Elevation                      | 100m                       | 3.02      | 0.026   | 14.66  | 3.66    | 0.050   | 14.66  | 1.52       | 0.065   | 5.55   |
| Slope                          | degree                     | 4.91      | 0.20    | 16.91  | 5.40    | 0.29    | 16.91  | 3.49       | 0.20    | 9.69   |
| AWC                            | m/m                        | 0.12      | 0.015   | 0.15   | 0.12    | 0.050   | 0.15   | 0.12       | 0.069   | 0.15   |
| Peatland                       | %                          | 3.00      | 0       | 73.22  | 6.50    | 0       | 62.98  | 10.84      | 0       | 73.22  |
| Population density             | k persons /km <sup>2</sup> | 0.85      | 1.74E-3 | 16.13  | 0.23    | 0.020   | 6.59   | 0.11       | 2.70E-3 | 2.07   |
| Protected area                 | %                          | 6.00      | 0       | 78.27  | 10.53   | 0       | 78.27  | 5.58       | 0       | 26.33  |
| Forest ratio                   | 1                          | 0.24      | 0       | 0.98   | 0.29    | 0       | 0.81   | 0.41       | 0       | 0.93   |
| Shrub ratio                    | 1                          | 0.090     | 0       | 0.97   | 0.10    | 0       | 0.73   | 0.18       | 1.16E-4 | 0.69   |
| Dry agriculture ratio          | 1                          | 0.28      | 0       | 0.97   | 0.36    | 0       | 0.94   | 0.27       | 8.88E-3 | 0.82   |

Table S4.1 Pairwise correlations between explanatory variables in country models

|                            | Shortwave radiation | Precipitation | Driest month precipitation | Temp   | Protected % | Elevation | Slope  | Mill density | AWC    | Access time | Population | Natural forest ratio | Shrub ratio | Dry agriculture | Oil palm potential | Export value (t-1) | Peatland % | Plantation in 1990 |
|----------------------------|---------------------|---------------|----------------------------|--------|-------------|-----------|--------|--------------|--------|-------------|------------|----------------------|-------------|-----------------|--------------------|--------------------|------------|--------------------|
| Shortwave radiation        | 1                   | -0.525        | -0.55                      | -0.052 | -0.243      | -0.066    | -0.033 | -0.195       | -0.19  | -0.419      | 0.084      | -0.374               | -0.101      | -0.043          | -0.58              | -0.047             | -0.278     | -0.219             |
| Precipitation              | -0.525              | 1             | 0.61                       | -0.041 | 0.251       | 0.117     | 0.002  | 0.044        | 0.189  | 0.291       | -0.04      | 0.141                | -0.039      | 0.089           | 0.454              | 0.06               | 0.156      | 0.089              |
| Driest month precipitation | -0.55               | 0.61          | 1                          | -0.086 | 0.334       | 0.137     | 0.123  | 0.11         | 0.113  | 0.447       | -0.073     | 0.354                | 0.002       | 0.007           | 0.273              | 0.075              | 0.179      | 0.197              |
| Temp                       | -0.052              | -0.041        | -0.086                     | 1      | -0.318      | -0.766    | -0.763 | 0.175        | 0.026  | -0.304      | 0.24       | -0.458               | -0.014      | 0.007           | 0.491              | 0.025              | 0.244      | 0.119              |
| Protected %                | -0.243              | 0.251         | 0.334                      | -0.318 | 1           | 0.397     | 0.392  | -0.039       | 0.02   | 0.416       | -0.192     | 0.547                | 0.023       | -0.096          | -0.115             | 0.002              | 0.074      | -0.034             |
| Elevation                  | -0.066              | 0.117         | 0.137                      | -0.766 | 0.397       | 1         | 0.787  | -0.123       | -0.089 | 0.215       | -0.209     | 0.367                | -0.077      | -0.006          | -0.488             | 0                  | -0.222     | -0.077             |
| Slope                      | -0.033              | 0.002         | 0.123                      | -0.763 | 0.392       | 0.787     | 1      | -0.144       | -0.159 | 0.29        | -0.323     | 0.575                | 0.076       | 0.036           | -0.407             | 0                  | -0.249     | -0.118             |
| Mill density               | -0.195              | 0.044         | 0.11                       | 0.175  | -0.039      | -0.123    | -0.144 | 1            | 0.064  | -0.041      | -0.06      | -0.07                | -0.054      | 0.105           | 0.173              | 0                  | 0.206      | 0.484              |
| AWC                        | -0.19               | 0.189         | 0.113                      | 0.026  | 0.02        | -0.089    | -0.159 | 0.064        | 1      | 0.008       | 0.149      | -0.059               | -0.167      | 0.003           | 0.27               | 0                  | 0.122      | 0.105              |
| Access time                | -0.419              | 0.291         | 0.447                      | -0.304 | 0.416       | 0.215     | 0.29   | -0.041       | 0.008  | 1           | -0.257     | 0.743                | 0.17        | -0.276          | 0.022              | 0                  | 0.226      | -0.094             |
| Population                 | 0.084               | -0.04         | -0.073                     | 0.24   | -0.192      | -0.209    | -0.323 | -0.06        | 0.149  | -0.257      | 1          | -0.321               | -0.136      | -0.208          | 0.054              | 0.018              | -0.116     | -0.078             |
| Natural forest ratio       | -0.374              | 0.141         | 0.354                      | -0.458 | 0.547       | 0.367     | 0.575  | -0.07        | -0.059 | 0.743       | -0.321     | 1                    | 0.172       | -0.304          | -0.095             | -0.05              | 0.136      | -0.115             |
| Shrub ratio                | -0.101              | -0.039        | 0.002                      | -0.014 | 0.023       | -0.077    | 0.076  | -0.054       | -0.167 | 0.17        | -0.136     | 0.172                | 1           | -0.138          | 0.06               | -0.069             | 0.173      | -0.055             |
| Dry agriculture ratio      | -0.043              | 0.089         | 0.007                      | 0.007  | -0.096      | -0.006    | 0.036  | 0.105        | 0.003  | -0.276      | -0.208     | -0.304               | -0.138      | 1               | 0.167              | 0.054              | -0.072     | 0.073              |
| Oil palm potential yield   | -0.58               | 0.454         | 0.273                      | 0.491  | -0.115      | -0.488    | -0.407 | 0.173        | 0.27   | 0.022       | 0.054      | -0.095               | 0.06        | 0.167           | 1                  | 0.001              | 0.28       | 0.219              |
| Export value (t-1)         | -0.047              | 0.06          | 0.075                      | 0.025  | 0.002       | 0         | 0      | 0            | 0      | 0           | 0.018      | -0.05                | -0.069      | 0.054           | 0.001              | 1                  | 0          | 0                  |
| Peatland %                 | -0.278              | 0.156         | 0.179                      | 0.244  | 0.074       | -0.222    | -0.249 | 0.206        | 0.122  | 0.226       | -0.116     | 0.136                | 0.173       | -0.072          | 0.28               | 0                  | 1          | 0.133              |
| Plantation in 1990         | -0.219              | 0.089         | 0.197                      | 0.119  | -0.034      | -0.077    | -0.118 | 0.484        | 0.105  | -0.094      | -0.078     | -0.115               | -0.055      | 0.073           | 0.219              | 0                  | 0.133      | 1                  |

Table S4.2 Pairwise correlations between explanatory variables in Sumatra models

|                            | Shortwave radiation | Precipitation | Driest month precipitation | Temp   | Protected % | Elevation | Slope  | Mill density | AWC    | Access time | Population | Natural forest ratio | Shrub ratio | Dry agriculture | Oil palm potential | Export value (t-1) | Peatland % | Plantation in 1990 |
|----------------------------|---------------------|---------------|----------------------------|--------|-------------|-----------|--------|--------------|--------|-------------|------------|----------------------|-------------|-----------------|--------------------|--------------------|------------|--------------------|
| Shortwave radiation        | 1                   | -0.214        | -0.314                     | -0.078 | 0.196       | 0.023     | 0.061  | -0.242       | 0.221  | 0.001       | 0.093      | 0.049                | -0.017      | 0.199           | -0.101             | -0.219             | -0.182     | -0.207             |
| Precipitation              | -0.214              | 1             | 0.603                      | -0.152 | 0.276       | 0.114     | 0.145  | -0.082       | 0      | 0.092       | -0.114     | 0.094                | -0.049      | 0.058           | -0.083             | 0.016              | -0.166     | -0.032             |
| Driest month precipitation | -0.314              | 0.603         | 1                          | -0.096 | 0.203       | 0.09      | 0.111  | 0.028        | -0.08  | 0.204       | 0.015      | 0.12                 | -0.117      | -0.163          | -0.077             | 0.135              | -0.03      | 0.168              |
| Temp                       | -0.078              | -0.152        | -0.096                     | 1      | -0.399      | -0.903    | -0.779 | 0.291        | 0.284  | -0.364      | 0.141      | -0.535               | 0.13        | 0.062           | 0.832              | 0.117              | 0.458      | 0.279              |
| Protected %                | 0.196               | 0.276         | 0.203                      | -0.399 | 1           | 0.5       | 0.435  | -0.148       | 0.016  | 0.516       | -0.13      | 0.614                | -0.155      | -0.249          | -0.527             | 0.004              | -0.099     | -0.226             |
| Elevation                  | 0.023               | 0.114         | 0.09                       | -0.903 | 0.5         | 1         | 0.837  | -0.253       | -0.334 | 0.408       | -0.138     | 0.624                | -0.117      | -0.17           | -0.893             | 0                  | -0.398     | -0.327             |
| Slope                      | 0.061               | 0.145         | 0.111                      | -0.779 | 0.435       | 0.837     | 1      | -0.288       | -0.522 | 0.463       | -0.179     | 0.731                | -0.012      | -0.246          | -0.661             | 0                  | -0.436     | -0.377             |
| Mill density               | -0.242              | -0.082        | 0.028                      | 0.291  | -0.148      | -0.253    | -0.288 | 1            | 0.107  | -0.191      | -0.048     | -0.259               | -0.182      | 0.105           | 0.228              | 0                  | 0.169      | 0.464              |
| AWC                        | 0.221               | 0             | -0.08                      | 0.284  | 0.016       | -0.334    | -0.522 | 0.107        | 1      | -0.247      | 0.067      | -0.27                | -0.194      | 0.191           | 0.165              | 0                  | 0.241      | 0.241              |
| Access time                | 0.001               | 0.092         | 0.204                      | -0.364 | 0.516       | 0.408     | 0.463  | -0.191       | -0.247 | 1           | -0.281     | 0.711                | 0.242       | -0.524          | -0.512             | 0                  | 0.205      | -0.335             |
| Population                 | 0.093               | -0.114        | 0.015                      | 0.141  | -0.13       | -0.138    | -0.179 | -0.048       | 0.067  | -0.281      | 1          | -0.245               | -0.183      | -0.11           | 0.152              | 0.014              | -0.114     | 0.104              |
| Natural forest ratio       | 0.049               | 0.094         | 0.12                       | -0.535 | 0.614       | 0.624     | 0.731  | -0.259       | -0.27  | 0.711       | -0.245     | 1                    | -0.052      | -0.551          | -0.596             | -0.104             | -0.068     | -0.403             |
| Shrub ratio                | -0.017              | -0.049        | -0.117                     | 0.13   | -0.155      | -0.117    | -0.012 | -0.182       | -0.194 | 0.242       | -0.183     | -0.052               | 1           | -0.253          | 0.052              | -0.065             | 0.198      | -0.264             |
| Dry agriculture ratio      | 0.199               | 0.058         | -0.163                     | 0.062  | -0.249      | -0.17     | -0.246 | 0.105        | 0.191  | -0.524      | -0.11      | -0.551               | -0.253      | 1               | 0.228              | 0.046              | -0.285     | -0.041             |
| Oil palm potential yield   | -0.101              | -0.083        | -0.077                     | 0.832  | -0.527      | -0.893    | -0.661 | 0.228        | 0.165  | -0.512      | 0.152      | -0.596               | 0.052       | 0.228           | 1                  | 0.007              | 0.299      | 0.309              |
| Export value (t-1)         | -0.219              | 0.016         | 0.135                      | 0.117  | 0.004       | 0         | 0      | 0            | 0      | 0           | 0.014      | -0.104               | -0.065      | 0.046           | 0.007              | 1                  | 0          | 0                  |
| Peatland %                 | -0.182              | -0.166        | -0.03                      | 0.458  | -0.099      | -0.398    | -0.436 | 0.169        | 0.241  | 0.205       | -0.114     | -0.068               | 0.198       | -0.285          | 0.299              | 0                  | 1          | 0.132              |
| Plantation in 1990         | -0.207              | -0.032        | 0.168                      | 0.279  | -0.226      | -0.327    | -0.377 | 0.464        | 0.241  | -0.335      | 0.104      | -0.403               | -0.264      | -0.041          | 0.309              | 0                  | 0.132      | 1                  |

Table S4.3 Pairwise correlations between explanatory variables in Kalimantan models

|                            | Shortwave radiation | Precipitation | Driest month precipitation | Temp   | Protected % | Elevation | Slope  | Mill density | AWC    | Access time | Population | Natural forest ratio | Shrub ratio | Dry agriculture ratio | Oil palm potential yield | Export value (t-1) | Peatland % | Plantation in 1990 |
|----------------------------|---------------------|---------------|----------------------------|--------|-------------|-----------|--------|--------------|--------|-------------|------------|----------------------|-------------|-----------------------|--------------------------|--------------------|------------|--------------------|
| Shortwave radiation        | 1                   | -0.231        | -0.315                     | 0.485  | -0.042      | -0.445    | -0.381 | 0.387        | -0.269 | -0.495      | 0.116      | -0.557               | -0.204      | 0.524                 | 0.127                    | -0.156             | 0.287      | 0.039              |
| Precipitation              | -0.231              | 1             | 0.729                      | -0.287 | 0.257       | 0.107     | 0.079  | 0.118        | 0.333  | 0.518       | -0.244     | 0.335                | -0.174      | -0.121                | -0.16                    | 0.127              | 0.177      | -0.146             |
| Driest month precipitation | -0.315              | 0.729         | 1                          | -0.36  | 0.154       | 0.31      | 0.241  | 0.073        | 0.435  | 0.528       | -0.095     | 0.382                | -0.198      | -0.158                | -0.363                   | 0.206              | 0.028      | -0.145             |
| Temp                       | 0.485               | -0.287        | -0.36                      | 1      | -0.274      | -0.877    | -0.818 | 0.319        | -0.112 | -0.631      | 0.472      | -0.708               | 0.414       | 0.256                 | 0.703                    | 0.096              | 0.356      | 0.222              |
| Protected %                | -0.042              | 0.257         | 0.154                      | -0.274 | 1           | 0.18      | 0.164  | -0.081       | -0.021 | 0.555       | -0.298     | 0.384                | 0.004       | -0.42                 | -0.372                   | 0                  | 0.152      | 0.082              |
| Elevation                  | -0.445              | 0.107         | 0.31                       | -0.877 | 0.18        | 1         | 0.964  | -0.261       | 0.014  | 0.522       | -0.312     | 0.698                | -0.363      | -0.294                | -0.818                   | 0                  | -0.384     | -0.202             |
| Slope                      | -0.381              | 0.079         | 0.241                      | -0.818 | 0.164       | 0.964     | 1      | -0.269       | -0.156 | 0.454       | -0.298     | 0.633                | -0.387      | -0.224                | -0.752                   | 0                  | -0.47      | -0.143             |
| Mill density               | 0.387               | 0.118         | 0.073                      | 0.319  | -0.081      | -0.261    | -0.269 | 1            | 0.159  | -0.166      | 0.09       | -0.247               | -0.226      | 0.292                 | 0.101                    | 0                  | 0.607      | 0.106              |
| AWC                        | -0.269              | 0.333         | 0.435                      | -0.112 | -0.021      | 0.014     | -0.156 | 0.159        | 1      | 0.289       | 0.142      | 0.174                | 0.012       | -0.121                | -0.11                    | 0                  | 0.231      | -0.148             |
| Access time                | -0.495              | 0.518         | 0.528                      | -0.631 | 0.555       | 0.522     | 0.454  | -0.166       | 0.289  | 1           | -0.456     | 0.782                | -0.154      | -0.539                | -0.466                   | 0                  | -0.05      | -0.172             |
| Population                 | 0.116               | -0.244        | -0.095                     | 0.472  | -0.298      | -0.312    | -0.298 | 0.09         | 0.142  | -0.456      | 1          | -0.47                | 0.303       | 0.217                 | 0.214                    | 0.075              | -0.009     | -0.173             |
| Natural forest ratio       | -0.557              | 0.335         | 0.382                      | -0.708 | 0.384       | 0.698     | 0.633  | -0.247       | 0.174  | 0.782       | -0.47      | 1                    | -0.181      | -0.716                | -0.479                   | -0.143             | -0.12      | -0.104             |
| Shrub ratio                | -0.204              | -0.174        | -0.198                     | 0.414  | 0.004       | -0.363    | -0.387 | -0.226       | 0.012  | -0.154      | 0.303      | -0.181               | 1           | -0.482                | 0.366                    | -0.016             | 0.082      | 0.098              |
| Dry agriculture ratio      | 0.524               | -0.121        | -0.158                     | 0.256  | -0.42       | -0.294    | -0.224 | 0.292        | -0.121 | -0.539      | 0.217      | -0.716               | -0.482      | 1                     | 0.132                    | 0.048              | 0.007      | -0.087             |
| Oil palm potential yield   | 0.127               | -0.16         | -0.363                     | 0.703  | -0.372      | -0.818    | -0.752 | 0.101        | -0.11  | -0.466      | 0.214      | -0.479               | 0.366       | 0.132                 | 1                        | 0                  | 0.143      | 0.267              |
| Export value (t-1)         | -0.156              | 0.127         | 0.206                      | 0.096  | 0           | 0         | 0      | 0            | 0      | 0           | 0.075      | -0.143               | -0.016      | 0.048                 | 0                        | 1                  | 0          | 0                  |
| Peatland %                 | 0.287               | 0.177         | 0.028                      | 0.356  | 0.152       | -0.384    | -0.47  | 0.607        | 0.231  | -0.05       | -0.009     | -0.12                | 0.082       | 0.007                 | 0.143                    | 0                  | 1          | -0.145             |
| Plantation in 1990         | 0.039               | -0.146        | -0.145                     | 0.222  | 0.082       | -0.202    | -0.143 | 0.106        | -0.148 | -0.172      | -0.173     | -0.104               | 0.098       | -0.087                | 0.267                    | 0                  | -0.145     | 1                  |



Table S5 Variance inflation factors

|                            | Indonesia | Sumatra | Kalimantan |
|----------------------------|-----------|---------|------------|
| Shortwave radiation        | 3.23      | 1.945   | 3.764      |
| Precipitation              | 2.338     | 2.085   | 3.581      |
| Driest month precipitation | 2.145     | 2.03    | 3.316      |
| Temp                       | 3.614     | 8.219   | 12.06      |
| Protected %                | 1.672     | 2.481   | 3.489      |
| Elevation                  | 5.215     | 17.987  | 75.805     |
| Slope                      | 5.434     | 10.281  | 38.412     |
| Mill density               | 1.392     | 1.55    | 2.962      |
| AWC                        | 1.233     | 2.082   | 2.649      |
| Access time                | 2.865     | 3.934   | 5.598      |
| Population                 | 1.413     | 1.768   | 2.561      |
| Natural forest ratio       | 5.283     | 9.281   | 28.235     |
| Shrub ratio                | 1.226     | 2.339   | 10.016     |
| Dry agriculture ratio      | 1.607     | 4.218   | 19.743     |
| Oil palm potential yield   | 3.621     | 9.572   | 8.671      |
| Export value (t-1)         | 1.034     | 1.395   | 1.95       |
| Peatland %                 | 1.388     | 2.256   | 3.784      |
| Plantation in 1990         | 1.491     | 2.519   | 2.001      |

\* Synthesizing the pairwise correlations and VIFs, we eliminated elevation from the Sumatra and Kalimantan models.

Table S6. Results of pooled and spatial panel models for bare ground expansion to natural forest in Kalimantan

|                            | Pooled        |         |      | Spatial Lag   |         |      | Spatial Error |         |      | Spatial Durbin |         |      |
|----------------------------|---------------|---------|------|---------------|---------|------|---------------|---------|------|----------------|---------|------|
|                            | $\hat{\beta}$ | t-value | sig. | $\hat{\beta}$ | t-value | sig. | $\hat{\beta}$ | t-value | sig. | $\hat{\beta}$  | t-value | sig. |
| (Intercept)                | -780.084      | -1.622  |      | -584.550      | -1.233  |      | -813.448      | -1.575  |      | -706.839       | -1.326  |      |
| Oil palm potential yield   | 0.027         | 0.203   |      | 0.014         | 0.104   |      | 0.061         | 0.480   |      | 0.071          | 0.598   |      |
| Plantation 1990            | 0.145         | 1.009   |      | 0.195         | 1.291   |      | 0.131         | 0.904   |      | 0.088          | 0.625   |      |
| Mill density               | 7.088         | 0.877   |      | 6.175         | 0.725   |      | 6.635         | 0.921   |      | 6.998          | 1.070   |      |
| Access time                | 1.879         | 1.290   |      | 1.374         | 0.917   |      | 1.235         | 0.825   |      | 1.000          | 0.680   |      |
| Temperature                | 2.542         | 1.567   |      | 1.908         | 1.195   |      | 2.633         | 1.515   |      | 2.252          | 1.257   |      |
| Shortwave radiation        | 0.041         | 0.719   |      | 0.036         | 0.620   |      | 0.067         | 1.119   |      | 0.089          | 1.438   |      |
| Precipitation              | -0.125        | -0.260  |      | -0.136        | -0.295  |      | -0.082        | -0.151  |      | 0.069          | 0.119   |      |
| Driest month precipitation | 1.430         | 2.744   | ***  | 1.100         | 2.300   | *    | 1.661         | 2.703   | ***  | 1.726          | 2.583   | ***  |
| AWC                        | 12.269        | 0.436   |      | 0.804         | 0.028   |      | -7.747        | -0.263  |      | -10.109        | -0.349  |      |
| Slope                      | -0.280        | -0.615  |      | -0.311        | -0.666  |      | -0.242        | -0.537  |      | -0.323         | -0.742  |      |
| Source land ratio          | 9.009         | 1.194   |      | 7.841         | 1.072   |      | 10.535        | 1.498   |      | 9.638          | 1.468   |      |
| Source land ratio2         | -6.907        | -0.838  |      | -6.065        | -0.757  |      | -6.116        | -0.808  |      | -4.311         | -0.619  |      |
| Population density         | -11.846       | -4.543  | **** | -12.420       | -4.764  | **** | -11.365       | -4.365  | **** | -9.780         | -3.771  |      |
| Export value               | 0.222         | 2.482   | **   | 0.138         | 1.701   | *    | 0.220         | 1.728   | *    | 0.361          | 1.729   | **** |
| Peatland                   | -0.069        | -1.908  | *    | -0.072        | -1.915  | *    | -0.073        | -2.027  | **   | -0.066         | -1.861  | *    |
| Protected %                | 0.143         | 1.785   | *    | 0.161         | 1.894   | *    | 0.164         | 2.169   | **   | 0.132          | 1.874   | *    |
| phi                        |               |         |      | 6.71E-02      | 0.930   |      | 3.19E-02      | 0.672   |      | 3.55E-02       | 0.738   | *    |
| rho                        |               |         |      |               |         |      | 0.441         | 5.997   | **** | 0.707          | 8.610   | **** |
| lambda                     |               |         |      | 0.368         | 4.852   | **** |               |         |      | -0.474         | -2.940  | ***  |
| R2                         | 0.411         |         |      |               |         |      |               |         |      |                |         |      |
| AIC                        | 1433.057      |         |      | 1480.652      |         |      | 1472.891      |         |      | 1468.827       |         |      |
| LogLik                     | -698.529      |         |      | -688.326      |         |      | -684.446      |         |      | -681.414       |         |      |

### Land Cover 1990

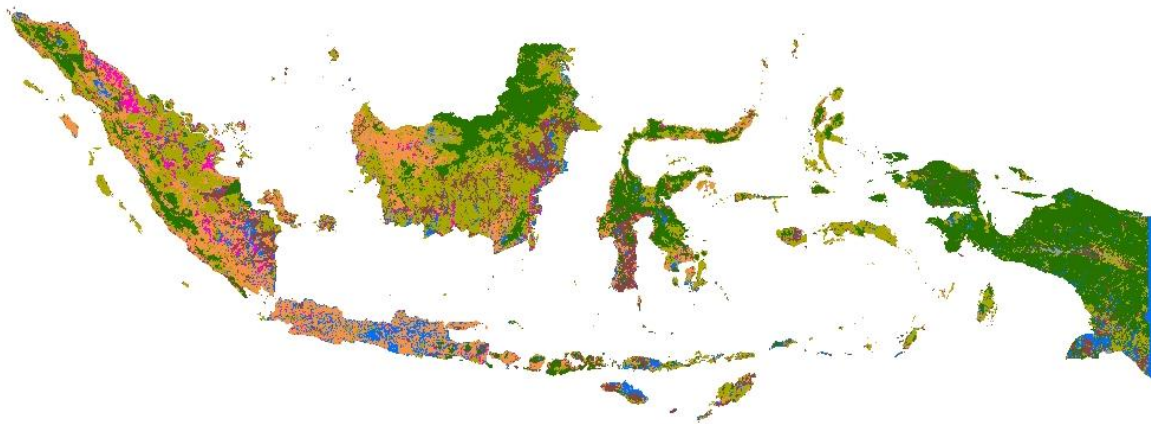

### Land Cover 2015

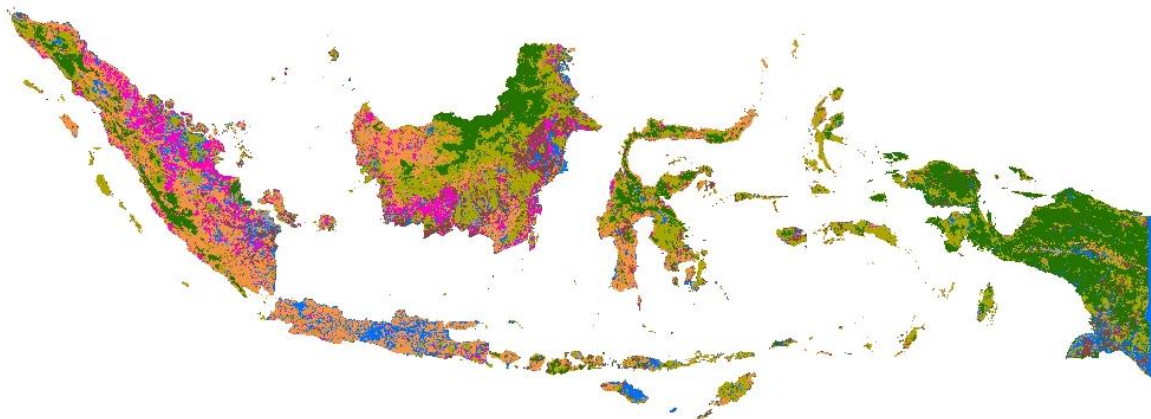

Primary Forest Secondary Forest Shrub Dry Agriculture Estate Crop Bare Ground Others

1,000 500 0 1,000 Kilometers

Data Source: Ministry of Environment and Forestry (MoEF)  
Projection: WGS 1984 Cylindrical Equal Area

Figure S1. Land cover maps of Indonesia (1990 and 2015) with 7 grouped classes

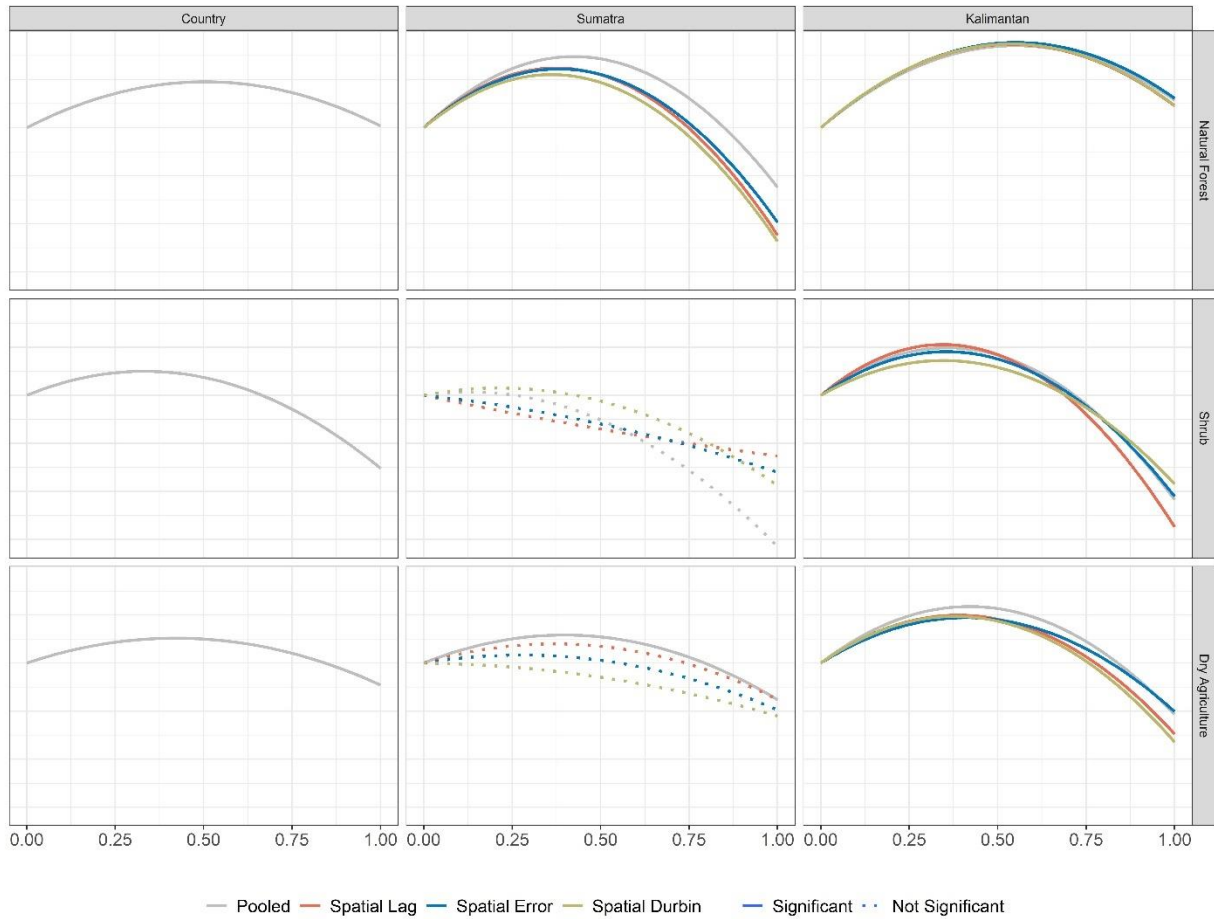

Figure S2. The polynomial relationship between oil palm expansion and source land ratio. On Sumatra, the inverted “U” shape relationship existed only in the expansion into natural forest for all models (inflection points at 0.361-0.424) and into dry agriculture for the pooled model (inflection points at 0.397). On Kalimantan, the inverted “U” shape relationship existed in all models, the inflection points are around 0.538-0.553 for natural forest, 0.346-0.359 for shrub, and 0.379-0.420 for dry agriculture.

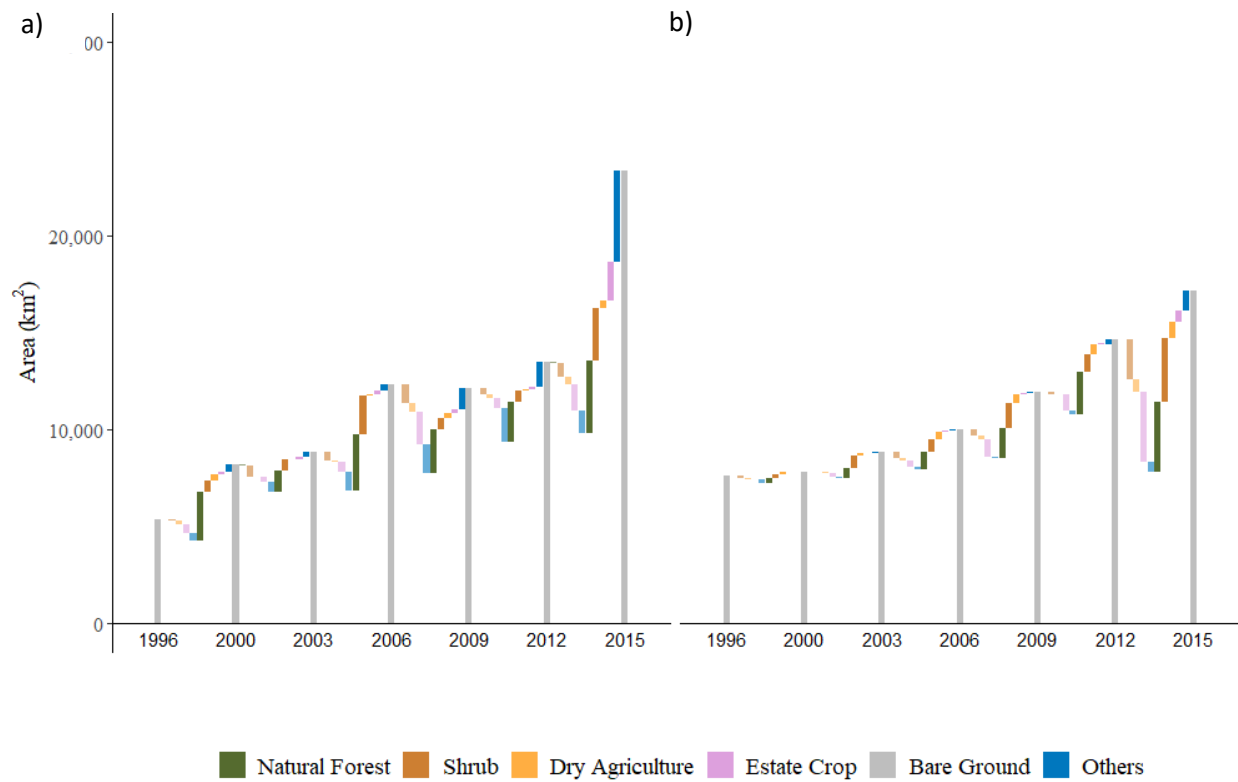

Figure S3. Direct conversions related to bare ground during 1996-2015. a) direct conversions related to bare ground in Sumatra; b) direct conversions related to estate crop in Kalimantan. The area of bare ground at each year are depicted by the bars cross the axis, while the floating bars depict the LULC changes among the seven classes. The increments indicate the inflows from other classes to bare ground, and the decrements indicate the outflows from bare ground to other LULC classes.

## References

- Center for International Earth Science Information Network - CIESIN - Columbia University. 2005. Gridded Population of the World, Version 3 (GPWv3): Population Density. Palisades, NY: *NASA Socioeconomic Data and Applications Center (SEDAC)*. <http://sedac.ciesin.columbia.edu/gpw/index.jsp>. Accessed 26<sup>th</sup> August 2018.
- Center for International Earth Science Information Network - CIESIN - Columbia University. 2016. Gridded Population of the World, Version 4 (GPWv4): Population Density. Palisades, NY: *NASA Socioeconomic Data and Applications Center (SEDAC)*. <http://dx.doi.org/10.7927/H4NP22DQ>. Accessed 26<sup>th</sup> August 2018.
- FAO/IIASA/ISRIC/ISSCAS/JRC, 2012. Harmonized World Soil Database (version 1.2). *FAO, Rome, Italy and IIASA, Laxenburg, Austria*.
- FAO (2002). GeoNetwork – Sub-national Administrative Units of Indonesia. *FAO, Rome, Italy*.
- FAO (2018a). Downloadable Data Sets. Retrieved from Food and Agriculture Organization of the United Nations: <http://www.fao.org/faostat/en/#data/TP>. Visited in December 2018.
- IIASA/FAO (2012) Global Agro-ecological Zones (GAEZ v3.0). *IIASA, Laxenburg, Austria and FAO, Rome, Italy*.
- IIASA/FAO (2018) Global Agro-ecological Zones (GAEZ v4). *IIASA, Laxenburg, Austria and FAO, Rome, Italy*.
- Indonesian Ministry of the Environment Life and Forestry. 2020. Indonesian Land Cover Closure. Available at: <http://webgis.menlhk.go.id:8080/pl/pl.htm>.
- NASA (2009) Shuttle Radar Topography Mission. In: *NASA: Jet Propulsion Laboratory California Institute of Technology*.
- Nelson, A. (2008). Travel time to major cities: A global map of Accessibility. *Ispra: European Commission*.
- Weedon, G.P., Balsamo, G., Bellouin, N., Gomes, S., Best, M.J. and Viterbo, P. (2014). The WFDEI meteorological forcing data set: WATCH Forcing Data methodology applied to ERA-Interim reanalysis data. *Water Resources Research*, 50, doi:10.1002/2014WR015638.
- World Database on Protected Areas (WDPA). Cambridge (UK). IUCN and UNEP. c2014. Available from: [www.protectedplanet.net](http://www.protectedplanet.net).
- World Resources Institute, Rainforest Alliance, Proforest, and Daemeter. "Universal Mill List." (2018). Accessed through Global Forest Watch on 26<sup>th</sup> August 2018. [www.globalforestwatch.org](http://www.globalforestwatch.org).
- World Resources Institute (2012). "Peat lands". Accessed through Global Forest Watch on November 12<sup>th</sup>, 2019. [www.globalforestwatch.org](http://www.globalforestwatch.org).
